# Supplementary material for: Characteristics of the Meibomian gland in a population without dry eye symptoms
Source: Research Square preprint supplement (doi:10.21203/rs.3.rs-6869046/v1), 2025-07-18
Supplement: Supplementary file 1 [file 6f94aa4394b880e9c2b872f0.docx]

**Supplement :** Grading of Meiboscore and lid margin characteristics

| **Grading** | **Meiboscore** |
| --- | --- |
| 0 | No meibomian gland loss |
| 1 | Meibomian gland loss <1/3 of the full length of the lid |
| 2 | Meibomian gland loss 1/3 to <2/3 of the full length of the lid |
| 3 | Meibomian gland loss >2/3 of the full length of the lid |
| **Grading** | **Plugging of meibomian gland orifices** |
| 0 | no plugging of gland orifices |
| 1 | fewer than 3 plugs of gland orifices |
| 2 | three or more plugs of gland orifices with a distribution of less than half of the full length of the lid |
| 3 | three or more plugs of gland orifices with a distribution of half or more of the full length of the lid |
| **Grading** | **Abnormal Lid Margin Findings of Vascularity** |
| 0 | No or slight redness in lid margin conjunctiva and no telangiectasia crossing the orifices of the meibomian gland |
| 1 | Redness in lid margin conjunctiva and no telangiectasia |
| 2 | Telangiectasia crossing the meibomian gland orifices with a distribution of less than half of the full length of the lid |
| 3 | Telangiectasia crossing the meibomian gland orifices with a distribution of half or more of the full length of the lid |
| **Grading** | **Lid Margin Irregularity** |
| 0 | No lid margin irregularity |
| 1 | Fewer than 3 lid margin irregularities with shallow notching |
| 2 | Three or more lid margin irregularities or deep notching |
| **Grading** | **Meibomian gland expressibility** |
| 0 | all 5 glands expressed |
| 1 | 3–4 glands expressed |
| 2 | 1–2 glands expressed |
| 3 | no gland expressed |
| **Grading** | **Meibum quality** |
| 0 | Clear meibum |
| 1 | Cloudy meibum |
| 2 | Cloudy with debris |
| 3 | Toothpaste-like |
